1

2

3 **Main Manuscript for**

4

5 **Universal open MHC-I molecules for rapid peptide loading and enhanced complex stability**  
6 **across HLA allotypes.**

7

8 <sup>1,2</sup>Yi Sun<sup>†</sup>, <sup>1,2</sup>Michael C. Young<sup>†</sup>, <sup>1,2</sup>Claire H. Woodward<sup>†</sup>, <sup>1,2</sup>Julia N. Danon, <sup>3</sup>Hau Truong, <sup>1</sup>Sagar  
9 Gupta, <sup>2</sup>Trenton J. Winters, <sup>2,3</sup>George Burslem, and <sup>1,2</sup>Nikolaos G. Sgourakis\*

10

11 <sup>1</sup>Center for Computational and Genomic Medicine, Department of Pathology and Laboratory  
12 Medicine, The Children's Hospital of Philadelphia, Philadelphia, PA, 19104, USA

13 <sup>2</sup>Department of Biochemistry and Biophysics, Perelman School of Medicine, University of  
14 Pennsylvania, 3401 Civic Center Blvd, Philadelphia, PA, 19104, USA

15 <sup>3</sup>Department of Cancer Biology and Epigenetics Institute, Perelman School of Medicine

16

17 <sup>†</sup>Contributed equally to this work.

18

19 **\*Correspondence:** Nikolaos G. Sgourakis

20 **Email:** Nikolaos.Sgourakis@Pennmedicine.upenn.edu

21 **Author Contributions:** N.G.S., Y.S., and M.C.Y. designed experiments. Y.S., M.C.Y., and J.N.D.  
22 designed plasmids and prepared all recombinant protein samples used in this study. T.J.W. and  
23 G.M.B. designed and synthesized peptide probes for FP experiments and refolding reactions.  
24 C.H.W. and H.T. performed NMR experiments, resonance assignments, and data analysis. Y.S.  
25 performed HDX experiments and data analysis, pMHC-I tetramerization, flow cytometry, and data  
26 analysis. J.N.D. performed FP experiments and data analysis. J.N.D. and M.C.Y. performed DSF  
27 experiments and data analysis. Y.S., M.C.Y., C.H.W., and N.G.S. wrote the paper, with feedback  
28 from all authors. N.G.S. acquired funding and supervised the project.

29

30 **Competing Interest Statement:** Y.S., M.C.Y., and N.G.S. are listed as co-inventors in a  
31 provisional patent application related to this work.

32

33 **Classification:** Biological Sciences. Biochemistry.

34

35 **Keywords:** Human Leucocyte Antigen, nonclassical MHC-I; peptide exchange; protein  
36 engineering; NMR; antigen processing and presentation

37

38 **This PDF file includes:**

39 Main Text

40 Figures 1 to 6

## 41 **Abstract**

42 The polymorphic nature and intrinsic instability of class I major histocompatibility complex (MHC-I)  
43 and MHC-like molecules loaded with suboptimal peptides, metabolites, or glycolipids presents a  
44 fundamental challenge for identifying disease-relevant antigens and antigen-specific T cell  
45 receptors (TCRs), hindering the development of autologous therapeutics. Here, we leverage the  
46 positive allosteric coupling between the peptide and light chain ( $\beta_2$  microglobulin,  $\beta_2m$ ) subunits for  
47 binding to the MHC-I heavy chain (HC) through an engineered disulfide bond bridging conserved  
48 epitopes across the HC/ $\beta_2m$  interface, to generate conformationally stable, open MHC-I molecules.  
49 Biophysical characterization shows that open MHC-I molecules are properly folded protein  
50 complexes of enhanced thermal stability compared to the wild type, when loaded with low- to  
51 intermediate-affinity peptides. Using solution NMR, we characterize the effects of the disulfide bond  
52 on the conformation and dynamics of the MHC-I structure, ranging from local changes in  $\beta_2m$   
53 interacting sites of the peptide binding groove to long-range effects on the  $\alpha_{2-1}$  helix and  $\alpha_3$  domain.  
54 The interchain disulfide bond stabilizes empty MHC-I molecules in a peptide-receptive, open  
55 conformation to promote peptide exchange across multiple human leucocyte antigen (HLA)  
56 allotypes, covering representatives from five HLA-A, six HLA-B supertypes, and oligomorphous HLA-  
57 Ib molecules. Our structural design, combined with conditional  $\beta$ -peptide ligands, provides a  
58 universal platform for generating ready-to-load MHC-I systems of enhanced stability, enabling a  
59 range of approaches to screen antigenic epitope libraries and probe polyclonal TCR repertoires in  
60 the context of highly polymorphic HLA-I allotypes, as well as oligomorphous nonclassical molecules.  
61

## 62 **Significance Statement**

63 We outline a structure-guided approach for generating conformationally stable, open MHC-I  
64 molecules with enhanced ligand exchange kinetics spanning five HLA-A, all HLA-B supertypes,  
65 and oligomorphous HLA-Ib allotypes. We present direct evidence of positive allosteric cooperativity  
66 between peptide binding and  $\beta_2m$  association with the heavy chain by solution NMR and HDX-MS  
67 spectroscopy. We demonstrate that covalently linked  $\beta_2m$  serves as a conformational chaperone  
68 to stabilize empty MHC-I molecules in a peptide-receptive state, by inducing an open conformation  
69 and preventing intrinsically unstable heterodimers from irreversible aggregation. Our study  
70 provides structural and biophysical insights into the conformational properties of MHC-I ternary  
71 complexes, which can be further applied to improve the design of ultra-stable, universal ligand  
72 exchange systems in a pan-HLA allelic setting.

73 **Main Text**

74

75 **Introduction**

76

77 The proteins of the class I major histocompatibility complex (MHC-I) are essential components of  
78 adaptive immunity in all jawed vertebrates(1). They function by displaying a broad spectrum of self,  
79 aberrant, or foreign epitopic peptides, derived from the endogenous processing of cellular proteins  
80 on the cell surface, thereby enabling immune surveillance by cytotoxic T lymphocytes (CTL) and  
81 Natural Killer (NK) cells(2). Classical MHC-I molecules comprise a 8-to-15-amino-acid peptide, an  
82 invariable light chain human  $\beta_2$  microglobulin ( $\beta_2m$ ), and a highly polymorphic heavy chain (HC)  
83 that contains three extracellular domains ( $\alpha_1$ ,  $\alpha_2$ , and  $\alpha_3$ )(3). The expansion of MHC-I genes in  
84 humans (human leukocyte antigens, or HLAs) has resulted in more than 35,000 alleles with  
85 polymorphic residues located on the peptide binding groove, composed by the  $\alpha_1$  and  $\alpha_2$  domains  
86 and a  $\beta$ -sheet floor(4). The polymorphic nature of HLA allotypes leads to a diversity of displayed  
87 peptide repertoires and interactions with molecular chaperones, other components of the antigen  
88 processing pathway, and T cell receptors (TCR), which ultimately define immune responses and  
89 disease susceptibility. Classical HLA-A and HLA-B allotypes can be further classified into 12  
90 supertypes according to their various peptide binding specificity, determined by primary anchoring  
91 interactions with the peptide positions 2, 3, 5, and 9(5, 6). Therefore, recombinant peptide-loaded  
92 MHC-I (pMHC-I) molecules are typically generated using *in vitro* refolding together with synthetic  
93 peptides(7) as soluble monomers and can be further prepared as tetramers or multimers(8). These  
94 reagents have been one of the most important tools for detecting, isolating, and stimulating CTLs,  
95 and screening, optimizing, and identifying immunodominant T cell epitopes for immunotherapy,  
96 diagnosis, and vaccine development(9).

97

98 The assembly and peptide loading of nascent pMHC-I molecules occurs in the lumen of the  
99 endoplasmic reticulum and involves many molecular chaperones, including the peptide loading  
100 complex (PLC)-restricted tapasin and the PLC-independent homologous, transporter associated  
101 with antigen processing (TAP)-binding protein related (TAPBPR). The folding of the MHC-I HC and  
102 the formation of disulfide bonds in the  $\alpha_2$  and  $\alpha_3$  domains is assisted by calnexin and ERp57(10).  
103 The HC then assembles with  $\beta_2m$  to generate an empty heterodimer that is highly unstable for most  
104 MHC-I alleles, which is stabilized by association with tapasin, ERp57, calreticulin, and TAP in the  
105 PLC(11). Both chaperones tapasin and TAPBPR can facilitate the binding of high-affinity peptides  
106 to confer the stability and proper trafficking of MHC-I, which finally resides on the cell surface for  
107 hours to days(12). Loading of high-affinity peptides induces a “closed” conformation of the  $\alpha_2$ -1 helix  
108 via negative allosteric modulation between non-overlapping peptide binding sites and  
109 tapasin/TAPBPR binding sites to release the chaperones(13). However, peptide loading and  $\beta_2m$

110 binding to the HC are positively allosterically coupled, together stabilizing the ternary complex(14).  
111 The peptide loading process is initiated by a rate-limiting step of  $\beta_2m$  association with the HC, which  
112 yields HCs with enhanced peptide binding affinity in the nanomolar range(15, 16). Consequently,  
113 maintaining a stable tertiary structure of pMHC-I requires not only the selection of a high-affinity  
114 peptide but also the proper function of  $\beta_2m$  as a conformational chaperone(14, 15). Although under  
115 sub-physiological temperatures, stable, peptide-deficient MHC-I HC/ $\beta_2m$  heterodimers have been  
116 reported to express on the cell surface, empty MHC-I molecules have a short half-life, and are  
117 rapidly internalized(17, 18). This intrinsic instability of empty MHC-I causes non-specific exogenous  
118 peptide binding and irreversible denaturation *in vitro*, limiting its application as an off-the-shelf  
119 molecular probe for ligand screening and T cell detection.

120

121 A tremendous amount of work has been invested in the biophysical characterization and  
122 engineering of pMHC-I molecules, with specific efforts being made to understand the molecular  
123 mechanisms of peptide loading, and to develop tools for peptide exchange. Conditional ligands,  
124 bound to the MHC-I, can be cleaved by UV exposure or released by increasing the temperature to  
125 generate empty molecules, which can be loaded with a rescuing peptide(19–21). Dedicated MHC-  
126 I chaperones, including TAPBPR and its orthologs, have also been used to stabilize an array of  
127 different MHC-I allotypes in a peptide-receptive conformation with a preferred binding to HLA-A  
128 over HLA-B and HLA-C alleles, promoting the exchange of low- to intermediate-affinity peptides for  
129 high-affinity peptides in a process known as “peptide-editing”(22–26). In addition, molecular  
130 dynamics (MD) simulations combined with a tryptophan fluorescence assay have shown that empty  
131 MHC-I molecules are not molten globules like previously reported(27), but have varying degrees of  
132 structure in the  $\alpha_1$  and  $\alpha_2$  helices(28, 29). More recent studies aim to stabilize peptide-deficient  
133 molecules by introducing a disulfide bond across the  $\alpha_1$  and  $\alpha_2$  helices, restricting the highly flexible  
134 F pocket of the peptide binding groove to mimic the peptide-bound state for common alleles, such  
135 as HLA-A\*02:01, HLA-A\*24:02, and HLA-B\*27:05(30–34). Other studies have sought to stabilize  
136 the pMHC-I complex by characterizing the interaction of mutant or orthologous  $\beta_2m$  variants. A  
137 functional study using human and murine  $\beta_2m$  variants bound to HLA-A\*02:01 and H-2D<sup>b</sup>  
138 demonstrated that human  $\beta_2m$  has a greater affinity for H-2D<sup>b</sup> than murine  $\beta_2m$ , resulting in  
139 enhanced complex stability due to a marked increase in polarity and the number of inter-chain  
140 hydrogen bonds(35). Another study identified a S55V mutant  $\beta_2m$  characterized by its capability to  
141 stabilize pMHC-I molecules to a greater extent than the wild type (WT), enhancing peptide binding  
142 and CD8+ T cell recognition(36). These studies, altogether, have emphasized the importance and

143 the possibility of generating conformationally stable, peptide-receptive MHC-I heterodimers across  
144 different allotypes by manipulating the malleable HC/ $\beta_2m$  interface.

145

146 In this work, we outline an alternative, structure-guided approach to engineering conformationally  
147 stable, peptide-receptive, open MHC-I molecules by introducing a disulfide bond bridging  
148 conserved sites across the HC/ $\beta_2m$  interface. We exploit the allosteric mechanisms governing the  
149 assembly of MHC-I complexes by locking pMHC-I proteins in an open, peptide-receptive state via  
150 the introduction of G120C and H31C mutations on flexible loop regions of the HC and  $\beta_2m$ ,  
151 respectively. We show that the interchain disulfide bond increases the thermostability of molecules  
152 loaded with low- and moderate-affinity peptide cargo. We use solution nuclear magnetic resonance  
153 (NMR) and hydrogen-deuterium exchange mass spectrometry (HDX-MS) to characterize a  
154 peptide-receptive, open conformation, and further demonstrate that engineered open MHC-I  
155 molecules have improved peptide exchange efficiency and overall stability across five HLA-A, all  
156 HLA-B supertypes(37), oligomorphic HLA-Ib alleles, HLA-E, -F and -G, and the MHC-like molecule  
157 MR1. Finally, we demonstrate that open MHC-I molecules are functionally competent in detecting  
158 antigen-specific cell populations, serving as a universal platform for identifying immunodominant  
159 peptide epitopes and probing T cell responses in research, preclinical or diagnostic settings.

160

## 161 **Results**

162

### 163 **Structure-guided disulfide engineering stabilizes suboptimal MHC-I ligands**

164

165 To engineer stable HLA molecules across different allotypes for rapid peptide exchange, we aimed  
166 to bridge the HC and the light chain  $\beta_2m$  through a disulfide bond based on the positive cooperativity  
167 between peptide and  $\beta_2m$  association with the HC(35, 38). We utilized a structure-guided approach  
168 by first aligning 215 high-resolution pMHC-I crystal structures that were curated in our previously  
169 developed database, HLA3DB (**Fig. 1A**). We found an average distance of 4.25 Å ( $3.7 \text{ \AA} \leq C\beta-C\beta$   
170  $\leq 4.9 \text{ \AA}$ ) between positions G120 of the HC and H31 of the  $\beta_2m$  (**Fig. 1A**). The distances between  
171 the paired residues G120 and H31 on the HC and the  $\beta_2m$ , respectively, fall within the molecular  
172 constraints (5.5 Å) for disulfide cross-linkage(39, 40). The structure of HLA-A\*02:01/ $\beta_2m$  shows  
173 that both regions are composed of flexible loops (**Fig. 1B**), which increase the probability of the two  
174 cysteine mutations forming a 90° dihedral angle necessary for disulfide bond formation(41).  
175 Additionally, a sequence alignment using 75 distinct HLA allotypes with a greater than 1% global  
176 population frequency revealed a conserved glycine at position 120, suggesting a potential  
177 generality of the design across distinct HLA allotypes, covering various HLA supertypes that can  
178 present diverse peptide repertoires (**Fig. S1**). Selected residues G120 and H31 between the HC  
179 and  $\beta_2m$  were further computationally validated using Disulfide by Design(42). Together, the

180 structure and sequence alignments indicate the possibility of applying the interchain disulfide cross-  
181 linkage to a broad range of HLA allotypes, including oligomeric HLA-Ib and monomeric  
182 nonclassical MHC-I-related proteins, to stabilize their ligand-receptive conformations.

183

184 We next sought to validate the design experimentally by expressing the G120C variant of one of  
185 the most common alleles HLA-A\*02:01 in *Escherichia coli*, isolated denatured proteins from  
186 inclusion bodies, and refolded it *in vitro* with the H31C variant of the  $\beta_2m$  in the presence of a low-  
187 affinity placeholder peptide, TAX8 (LFGYPVYV). Size exclusion chromatography (SEC) and  
188 SDS/PAGE confirmed the formation of a G120C/H31C HLA-A\*02:01/ $\beta_2m$  complex (hereafter  
189 referred to as open HLA-A\*02:01) and the interchain disulfide bond (**Fig. 1C**). We then performed  
190 differential scanning fluorimetry (DSF) and observed a substantial improvement in the thermal  
191 stability of the open HLA-A\*02:01 compared to the WT with melting temperatures ( $T_m$ ) of 48.8 °C  
192 and 41.6 °C, respectively (**Fig. 1C**). Furthermore, the WT and open HLA-A\*02:01/ $\beta_2m$ /TAX8 were  
193 further exchanged with 50 peptides from the Cancer Genome Atlas (TCGA) epitope library (**Table**  
194 **S1**). While the resulting  $T_m$  values of WT and open HLA-A\*02:01 loaded with high-affinity peptides  
195 (WT  $T_m \geq 53$  °C) were similar, a pronounced stabilizing effect was demonstrated on the open over  
196 WT HLA-A\*02:01 when suboptimally loaded with low- to moderate-affinity peptides (WT  $T_m < 53$   
197 °C) (**Fig. 1D**). Therefore, evaluation of thermal stabilities for HLA-A\*02:01-restricted epitopes  
198 spanning a broad range of affinities showed that disulfide linkage between the HC and  $\beta_2m$  did not  
199 impede peptide binding, and consistently support the role of  $\beta_2m$  in chaperoning and stabilizing the  
200 HC for peptide loading.

201

## 202 **Disulfide-engineered pMHC-I shows conformational changes at dynamic sites**

203

204 Conformational plasticity and dynamics have been previously shown to be important for several  
205 aspects of MHC-I function, including peptide loading, chaperone recognition, and TCR  
206 triggering(43–46). To elucidate differences in conformational landscapes of peptide-loaded MHC-I  
207 molecules, we used established solution NMR methods(47). First, we refolded WT and open  
208 A\*02:01/ $\beta_2m$  complexes with a high-affinity MART-1 peptide ELAGIGILTV, which were isotopically  
209 labeled with  $^{15}N$ ,  $^{13}C$ , and  $^2H$  at either the MHC-I heavy or the  $\beta_2m$  light chain, followed by re-  
210 introduction of exchangeable protons during complex refolding. After independently assigning both  
211 protein subunits using a suite of TROSY-based triple resonance experiments(48) (**Fig. S2, S3**), we  
212 measured differences in backbone amide chemical shifts between the WT and open HLA-A\*02:01.  
213 We then calculated chemical shift perturbations (CSPs) capturing both the amide  $^1H$  and  $^{15}N$   
214 chemical shift changes. Residues showing CSPs above 0.05 ppm (5 times the sensitivity relative  
215 to  $^1H$ ) were mapped on the complex structure to highlight sites undergoing changes in the local  
216 magnetic environment (**Fig. 2**).



217

218 In total, we identified 38 residues that were significantly affected by the formation of the interchain  
219 disulfide bond, signifying substantial, global differences between the conformational ensembles  
220 sampled by open and WT MHC-I molecules in solution (**Fig. 2A, B**). As expected, most of the  
221 impacted residues were found near the HC and  $\beta_2m$  interface in the region surrounding the disulfide  
222 linkage (G120C and H31C) (**Fig. 2C**). Particularly, the  $\beta$ -sheet floor of the peptide binding groove,  
223 including the C, D, E, and F pockets showed high CSP values (**Fig. 2A, C**). Arginine at position 3,  
224 located on the flexible loop region close to the engineered disulfide bond, was the most affected  
225 residue on the  $\beta_2m$  subunit (**Fig. 2B, C**). These effects indicate local structural rearrangements,  
226 induced at the vicinity of the disulfide linkage. Remarkably, our NMR data also indicate CSPs at  
227 residue W60 in  $\beta_2m$ , while F56 displayed exchange broadening in the open but not in the WT,  
228 indicating altered microsecond to millisecond timescale dynamics (**Fig. 3D**). As shown in previous  
229 studies, the species-conserved F56 and W60 in  $\beta_2m$  play a central role in stabilizing the interface  
230 with the  $\alpha_1\alpha_2$  domain, acting as a conformational switch which controls peptide binding and  
231 release(35, 49, 50). Additionally, the HLA allele-conserved residues F8, T10, Q96, and M98 form  
232 the central part of a hydrophobic pocket together with F56, W60, and F62 from  $\beta_2m$ (35). Therefore,  
233 the conformational changes observed for these residues upon covalently associating the HC and  
234  $\beta_2m$  may contribute to the overall stabilization of the peptide-loaded MHC-I, given the known role  
235 of  $\beta_2m$  in promoting an allosteric enhancement of peptide binding(51, 52).

236

237 Moreover, residues H31 and W60 in  $\beta_2m$  were also known to participate in a hydrogen bond  
238 network together with residues Q96, G120, and D122 in the  $\alpha_1\alpha_2$  domains(35, 50). Our NMR data  
239 show that disulfide bond formation rearranges this network, including R3, D34, D53, and W60 on  
240  $h\beta_2m$  and corresponding R14, R35, R48, and D122 on the HC (**Fig. 3E**). In addition, we observe  
241 long-range CSPs on the  $\alpha_{2-1}$  helix and the far end of the  $\beta$ -sandwich fold on the  $\alpha_3$  domain (**Fig.**  
242 **2A, C**). This long-range effect supports our hypothesis that the interchain disulfide can trigger  
243 substantial global changes in protein dynamics, since the  $\alpha_{2-1}$  helix has been previously shown to  
244 transition between open and closed states of the MHC-I groove for peptide loading. Similarly, our  
245 CSP data show a pronounced long-range effect suggesting a repacking of residues T187, M189,  
246 H191, and H197 within the  $\alpha_3$  domain, via a lever arm effect transduced through residue T182  
247 located on the loop joining the  $\alpha_2$  and  $\alpha_3$  domains. Thus, these results collectively demonstrate  
248 extensive local and long-range structural changes introduced by the bridging disulfide between the  
249 HC and  $\beta_2m$ . Further, our NMR data suggest that the engineered disulfide bond may enhance  
250 peptide loading by inducing an allosteric conformational change of the peptide binding groove.

251

252

253



## 254 **Interchain disulfide bond formation induces a peptide-receptive MHC-I conformation**

255 To test our hypothesis that the covalent linkage association between the  $\beta_2m$  and  $\alpha_1\alpha_2$  interface  
256 can improve the overall stability of empty MHC-I molecules, we used DSF to compare the percent  
257 unfolding of WT and open HLA-A\*02:01 refolded with a photo-sensitive peptide upon varying  
258 periods of UV irradiation. While, in the absence of a rescuing peptide, WT molecules showed  
259 increasing amounts of protein denaturation, as measured by increased binding to the hydrophobic  
260 SYPRO orange, open heterodimers showed no substantial increase in the amount of unfolded  
261 protein leading to a 5-fold higher percent unfolding for the WT upon 1-hour UV irradiation (**Fig. 3B**).  
262 This is consistent with our previous DSF results showing that open molecules exhibit higher thermal  
263 stabilities when either empty or loaded with low- to moderate-affinity peptides (**Fig. 1D**). We next  
264 performed hydrogen-deuterium exchange-mass spectrometry (HDX-MS)(53) to identify differences  
265 in solvent accessibility patterns between open HLA-A\*02:01 molecules in their peptide-loaded and  
266 empty states. Tandem analysis of the percent deuterium uptake as a function of exchange reaction  
267 time for different peptide fragments revealed exchange saturation within 600 seconds (**Fig. S4**).  
268 We observed significant differences in HDX patterns at specific regions, including the peptide  
269 binding groove, the  $\alpha_3$  domain, and the  $\beta_2m$  subunit (**Fig. 3D**). We also found low deuterium  
270 exchange on regions corresponding to the  $\alpha_1$  helix and  $\beta$ -sheet floor of the peptide binding groove  
271 for the loaded molecules. Previous studies for WT HLA-A\*02:01 have established that the  $\alpha_{2-1}$  helix  
272 shows high deuterium uptake in the empty state(26, 54), likely due to an approximate 3 Å widening  
273 of the groove seen in crystal structures(13, 45, 55). In contrast, our HDX data recorded for open  
274 HLA-A\*02:01 showed that residues 140-159 on the  $\alpha_{2-1}$  helix have a similar level of deuterium  
275 uptake between the peptide-loaded and empty molecules (**Fig. 3B, Fig. S4**). These results suggest  
276 that bridging the HC/ $\beta_2m$  interface facilitates the transition between open and closed states,  
277 enhancing the exchange of peptide ligands.

278 To examine whether the stabilizing effects of the MHC-I groove revealed by our NMR and HDX  
279 data bear any functional consequences in promoting peptide exchange, we compared the binding  
280 traces of a fluorophore-labeled peptide to HLA-A\*02:01 molecules refolded with the suboptimal  
281 placeholder peptide TAX8 (56). The observed apparent association rates ( $K_{assoc.}$ ) were determined  
282 by fitting a one-phase association model. We incubated the same concentration of refolded WT or  
283 open TAX8/HLA-A\*02:01 complexes with a fluorescently labeled  $TAMRA$ TAX9 peptide, and  
284 measured a 10-fold higher exchange rate for the open molecules (**Fig. 3C**). Accordingly, high-  
285 affinity TAX9 could be readily loaded into the open or WT HLA-A\*02:01 molecules, out-competing  
286 for the binding of fluorescent TAX9 (**Fig. 3D**). However, despite showing different peptide exchange  
287 kinetics, TAX9 showed identical  $IC_{50}$  values (approx. 200 nanomolar range) between WT and open  
288 HLA-A\*02:01 (**Fig. 3C, D**). Taken together, these results support that the engineered disulfide bond

289 indeed allosterically induces an open conformation of the MHC-I groove to enhance exchange  
290 kinetics, albeit without influencing the free energy of peptide binding.

291

## 292 **Open MHC-I molecules promote ligand exchange on a broad repertoire of HLA allotypes**

293

294 We next sought to investigate how stabilizing the open MHC-I conformation may contribute to  
295 enhanced peptide exchange kinetics. To do this, we developed independent FP assays under  
296 conditions that allowed us to monitor the dissociation or association of  $TAMRA_{TAX9}$  to WT versus  
297 open HLA-A\*02:01 molecules (**Fig. 4A, B**). When HLA-A\*02:01 was refolded with the high-affinity  
298  $TAMRA_{TAX9}$  probe and incubated with a large molar excess of competing TAX9 peptide, open  
299 molecules demonstrated a minor decrease in polarization anisotropy relative to the WT, indicating  
300 accelerated dissociation of  $TAMRA_{TAX9}$  from the MHC-I groove (**Fig. 4C**). This is due to the presence  
301 of the high-affinity (nanomolar range  $K_D$ )  $TAMRA_{TAX9}$  peptide with a slow dissociation rate from both  
302 molecules, becoming the rate-limiting step in the overall reaction scheme (**Fig. 4A**). Conversely,  
303 when probing peptide association (**Fig. 4A**) open HLA-A\*02:01 molecules refolded with the  
304 intermediate affinity placeholder peptide TAX8 showed a much higher rate of exchange with the  
305  $TAMRA_{TAX9}$  probe (**Fig. 4C, Fig. S5**), reaching a higher plateau at steady-state. In agreement with  
306 our established peptide dissociation experiments, these results indicate noticeably higher amounts  
307 of stable, peptide-receptive molecules for the open variant than the WT at the same overall protein  
308 concentration. To quantitatively compare the effect of disulfide bridging on peptide exchange  
309 kinetics for different MHC-I systems, we measured an apparent association rate constant,  $k_{on}^{app}$ ,  
310 defined as the slope of the linear correlation between  $K_{assoc.}$  and the TAX8/HLA-A\*02:01 protein  
311 concentration. Under the first-order reaction scheme shown in Fig. 4B, this rate is proportional to  
312 the concentration of empty, receptive HLA-A\*02:01 molecules in the system (**Fig. 4B, D**). Open  
313 HLA-A\*02:01, compared to the WT, exhibited a more than 10-fold enhancement of the apparent  
314  $k_{on}$ , which is determined by both the formation of receptive molecules and the stability of these  
315 empty molecules (**Fig. 4D**). Taken together, open HLA-A\*02:01 demonstrated faster kinetics of  
316 peptide exchange, likely because the rate-limiting transition, the intermediate step required to  
317 generate empty, receptive molecules, is faster due to the allosteric effects on  $\alpha_{2-1}$  helix of the  
318 peptide binding groove originating from stable, covalent association with  $\beta_2m$ , as shown by our  
319 NMR and HDX-MS data (**Fig 2, Fig. 3B**).

320

321 Empty, open MHC-I molecules can exist as a pre-equilibrium with the placeholder peptide-bound  
322 state to enable a rapid association with any high-affinity peptide ligand, in a ready-to-load manner.  
323 We further hypothesized that the interchain disulfide engineering could be applied to different HLA  
324 allotypes resulting in a universal, open MHC-I platform for antigen screening experiments. To  
325 quantitatively compare peptide exchange rates across different alleles, we then performed a series

326 of FP experiments using optimized placeholder peptides, pHLA concentrations, and the  
327 protocol(26), where the binding of high-affinity fluorophore-labeled peptides was monitored through  
328 an increase in polarization (**Fig. S6**). Representatives covering five HLA-A and all HLA-B  
329 supertypes (A01, A02, A0103, A0124, A24 and B07, B08, B27, B44, B58, B62) were selected  
330 based on their global allelic frequency (**Table S2**). Additionally, we extended the study to cover the  
331 oligomorphic class Ib molecules, namely HLA-E\*01:03 and HLA-G\*01:01 (**Table S2**).

332

333 Our FP results showed that open MHC-I molecules (**Table S3**) demonstrate improved peptide  
334 exchange efficiency compared to the WT. Like open HLA-A\*02:01 molecules, open HLA-B\*07:02  
335 exhibited a more than 20-fold increase in the apparent rate constant  $K_{\text{assoc}}$ . (**Fig. 4E, Fig. S6E**).  
336 Both open HLA-A\*24:02 and HLA-E\*01:03 displayed enhanced peptide exchange kinetics by  
337 approximately 6- and 4-fold (**Fig. 4E, Fig. S6B, K**). The remaining allotypes, HLA-A\*01:01,  
338 A\*29:02, A\*30:01, B\*08:01, B\*15:01, B\*38:01, B\*58:01, and G\*01:01, showed a fitted  $K_{\text{assoc}}$  only in  
339 their open forms rather than in their WT counterparts (**Fig. 4E, Fig. S6**). Overall, we consistently  
340 observed a stabilizing effect on low to moderate-affinity peptide-loaded molecules across alleles  
341 (WT  $T_m < 53$  °C) (**Table. S4**). When loaded with a high-affinity peptide (WT  $T_m \geq 53$  °C),  $T_m$  values  
342 generally stayed the same between the open and the WT, except for HLA-G\*01:01 (**Table. S4**).  
343 Noticeably, suboptimally loaded HLA-B\*37:01 in both open or WT format exhibited similar thermal  
344 stabilities and peptide exchange kinetics, revealing that receptive, empty molecules were pre-  
345 existing in the sample for peptide binding. Although open MHC-I demonstrated fast exchange  
346 kinetics, we showed that two type 1 diabetes (T1D) epitopic peptides, HLVEALYLV and  
347 ALIDVVFHQY, have the same  $IC_{50}$  towards both the WT and open variants encompassing HLA-  
348 A\*02:01 and HLA-A\*29:02 (**Fig. S7**). In summary, our FP results demonstrate that a wide range of  
349 open HLA allotypes exhibit enhanced thermal stabilities when loaded with suboptimal peptides,  
350 and greatly accelerated peptide exchange efficiency without compromising the stability of the  
351 resulting high-affinity pHLA complexes. These results provide additional evidence to support our  
352 hypothesis that the interchain disulfide bond offers an adaptable structural feature, which stabilizes  
353 a receptive MHC-I state, therefore enabling the spontaneous loading of peptide ligands across  
354 polymorphic HLA allotypes.

355

### 356 **Application of open MHC-I as molecular probes for T cell detection and ligand screening**

357

358 We finally evaluated the use of open MHC-I molecules as ready-to-load reagents in tetramer-based  
359 T cell detection strategies. We conducted 1-hour peptide exchange reactions at room temperature  
360 (RT) for both WT and open HLA-A\*02:01 loaded with a placeholder peptide (KILGIVF $\beta$ FV(26)) for  
361 an established tumor-associated antigen, NY-ESO-1 (SLLMWITQV). BSP-tagged HLA-A\*02:01  
362 were purified, biotinylated, and tetramerized using streptavidin labeled with predefined

363 fluorochromes (**Fig. 5A, Fig. S8**). We then stained primary CD8<sup>+</sup> T cells transduced with the TCR  
364 1G4 that recognizes the NY-ESO-1 peptide displayed by HLA-A\*02:01(57). Compared to WT HLA-  
365 A\*02:01/NY-ESO-1, tetramers generated with open molecules exhibited a similar staining level  
366 (**Fig. 5B**). We used non-exchanged HLA-A\*02:01/KILGIVFβFV molecules as negative controls.  
367 Analysis by flow cytometry showed minimal levels of background staining using the open tetramers  
368 (**Fig. 5C**), showing that the 1G4 was not able to recognize HLA-A\*02:01/KILGIVFβFV. However,  
369 the WT tetramers demonstrated a higher level of background staining, exhibiting one order of  
370 magnitude lower intensity relative to the WT HLA-A\*02:01/NY-ESO-1 tetramer staining levels (**Fig.**  
371 **5C**), likely due to the formation of empty MHC-I heterodimers, which can interact with the CD8 co-  
372 receptor(58). The noticeable difference in background staining might also be caused by varying  
373 levels of formation of protein aggregates induced by peptide dissociation and subsequent loss of  
374 β<sub>2m</sub>. Despite having rapid peptide exchange kinetics, disulfide-engineered open MHC-I  
375 demonstrated comparable IC<sub>50</sub> values for binding of high-affinity epitopes to the WT and  
376 heterodimer stabilization in a conformation that is receptive to peptides (**Fig. 3D, Fig. S7**). In  
377 addition, open HLA-A\*02:01 loaded with moderate-affinity peptides, SLLMWITQC and  
378 SLLMWITQA (NYESO C and A), via exchange reaction show consistent T cell staining (**Fig. 5D**).  
379 Thus, the engineered disulfide does not interfere with the peptide binding and interactions with T  
380 cell receptors. Having a reduced level of background staining allows the use of higher  
381 concentrations of tetramers to study interactions with low-affinity TCRs, as seen, for example, in  
382 the case of autoimmune peptide epitopes(64). Using open MHC-I as a ready-to-load system can  
383 help elucidate the intrinsic peptide selector function across different alleles to optimize peptide  
384 binding motifs, but also has important ramifications for developing combinatorial barcoded libraries  
385 of pHLA antigens toward TCR repertoire characterization(59).

386  
387 Finally, we extended the design of open HLA-I to nonclassical MHC-I, MR1, which can present  
388 small molecule metabolites via both non-covalent and covalent loading by the A pocket (**Fig. S9A**).  
389 We demonstrated that the open MR1 C262S could be refolded in vitro with covalently linked  
390 molecules Ac-6-FP and the non-covalent molecule DCF with a noticeable improvement in protein  
391 yield (**Fig. S9B, C**). Consistently, we observed a substantial upwards shift of the T<sub>m</sub> by more than  
392 10°C for the open MR1/Ac-6-FP than the WT (**Fig. S9D**). HLA-F\*01:01 molecules known to be  
393 stable in their empty form and accommodating long peptides with a length range from 7 to >30  
394 amino acids averaging at 12 residues(60) can also adapt the same structural design to generate  
395 open heterodimers (**Fig. S9E**). These results further support the universality of the open platform,  
396 covering not only classical HLA Ia allotypes but also the oligomorphic HLA Ib and nonclassical  
397 MHC-I.

398 **Discussion**

399

400 The inherent instability of peptide-deficient MHC-I heterodimers is a major pitfall of current peptide  
401 exchange technologies, limiting screening applications for important therapeutic antigens. Our  
402 combined biochemical and biophysical characterization outlines a universal design strategy for  
403 generating ready-to-load MHC-I conformers across various disease-relevant HLA allotypes.  
404 Compared to the UV- or heat-induced peptide exchange methods(19, 21), open MHC-I molecules  
405 combined with  $\beta$ -peptide “goldilocks” ligands introduce mild exchange conditions suitable for large-  
406 scale screening applications. Previous work has highlighted the potential of chaperone-mediated  
407 exchange in various settings (24, 61, 62). While tapasin has shown preferential binding to HLA-B  
408 alleles, TAPBPR preferably interacts with HLA-A alleles but mainly covers the A02 and A24  
409 supertypes(46, 63). More recent work has expanded the TAPBPR-mediated peptide exchange on  
410 a broad repertoire of allotypes using TAPBPR orthologs and engineered variants(26). However,  
411 compared to the open MHC-I platform, the approach requires optimized placeholder peptides and  
412 recombinant chaperone proteins to stabilize empty, receptive molecules. Ready-to-load MHC-I  
413 molecules have been derived through the introduction of an engineered disulfide bond between  
414 WT residues Tyr 84 and Ala 139, linking the  $\alpha_1$  and  $\alpha_2$  helices at the F pocket to stabilize MHC-I  
415 molecules in an empty, receptive conformation(32). However, this approach has been applied in  
416 limited HLA alleles(30–34). Open MHC-I molecules exploit the positive cooperativity between  
417 peptide association and  $\beta_2m$  binding to the HC(16, 38) to stabilize the peptide binding groove in an  
418 open conformation without directly altering the properties of the MHC-I peptide binding groove.  
419 Instead, our approach exploits the known allosteric switch connecting W60 from  $\beta_2m$  with the floor  
420 of the MHC-I groove and  $\alpha_{2-1}$  helix, to generate molecules with favorable exchange properties. We  
421 show the generality of the design by aligning both sequences and structures and demonstrating  
422 peptide exchange applications for representatives from five HLA-A and all HLA-B supertypes.

423

424 Our complementary FP assays show that both WT and open MHC-I molecules loaded with  
425 moderate-affinity placeholder peptides undergo a slow but spontaneous peptide unloading process  
426 to generate empty molecules (**Fig. 6A**). While such empty WT MHC-I heterodimers are intrinsically  
427 unstable and susceptible to  $\beta_2m$  loss and irreversible heavy chain aggregation through the  
428 exposure of hydrophobic surfaces, open MHC-I molecules maintain a soluble reservoir of receptive  
429 molecules for peptide loading (**Fig. 6B**). Previous studies have demonstrated that the flexibility of  
430 the  $\alpha_{2-1}$  helix allows the peptide binding groove to dynamically shift between an open and closed  
431 state for peptide exchange(6, 64). Binding to high-affinity peptides triggers the closed conformation,  
432 and promotes the dissociation of molecular chaperones, which are known to recognize an open  
433 conformational epitope at the  $\alpha_{2-1}$  helix(13, 46, 65, 66). Using solution NMR, we have demonstrated  
434 that our open MHC-I molecules undergo an allosteric conformational change of the  $\alpha_{2-1}$  helix, which

435 enables the rapid capture of incoming peptides without perturbing the global stability of the resulting  
436 pMHC-I product. Open MHC-I molecules, therefore, enhance the rate of generating receptive  
437 molecules, which is the rate-limiting step in the overall peptide exchange reaction scheme. Our  
438 HDX-MS and DSF data reveal an increase in solvent exposure for the  $\alpha_{2-1}$  helix in both peptide-  
439 loaded and empty states without compromising the thermal stabilities of open MHC-I molecules.  
440 This indicates that the energy barrier separating the open and closed states might be minimized,  
441 sequentially lowering the activation free energy for peptide unloading (**Fig. 6C**). Therefore, the  
442 covalently linked  $\beta_2m$  further functions as a conformational chaperone to allosterically induce the  
443 open conformation of the peptide binding groove, resulting in rapid peptide loading and unloading  
444 in favor of high-affinity over placeholder peptides.

445

446 Open MHC-I allows for minimal protein modifications leading to enhanced exchange reactions  
447 across allotypes. Thus, these molecules could be a versatile tool for screening antigenic epitopes,  
448 enabling the detection of low-frequency receptors. Further, it is necessary to confirm that open  
449 MHC-I molecules are not interfering with peptide repertoire selection or interactions with cognate  
450 TCRs. A more detailed study of thermodynamic parameters relevant to peptide binding using  
451 Isothermal Titration Calorimetry (ITC) will provide additional insights into how the presence of the  
452 interchain disulfide modulates the peptide-free energy landscape. Additionally, a follow-up study  
453 using the open MHC-I focusing on detecting antigen-specific T cells across different HLA allotypes  
454 is required to demonstrate the broad usage of this platform as an off-the-shelf reagent. In summary,  
455 we outline an alternative structure-guided design of open MHC-I molecules that are  
456 conformationally stable and ligand-receptive across five HLA-A and all HLA-B supertypes,  
457 oligomorphic HLA-Ib alleles, HLA-E, -G, and -F, and nonclassical MHC-like molecules, MR1. Our  
458 data provide a framework for exploring the allosteric networks that exist in the structures of native  
459 MHC-I molecules to further guide the design of ultra-stabilized, universal ligand exchange  
460 technologies, which can be used to address highly polymorphic HLA allotypes.

461 **Acknowledgments**

462 This work was supported through grants by NIAID (5R01AI143997), NIDDK (5U01DK112217), and  
463 NIGMS (5R35GM125034) to N.G.S. and NIGMS (R35GM142505) to G.M.B. We acknowledge NIH  
464 training grant (T32GM132039) for support to C.H.W. We acknowledge Dr. Andy J. Minn and Devin  
465 Dersh (University of Pennsylvania) for providing the primary CD8<sup>+</sup> cell lines for cell staining and  
466 flow cytometry. We acknowledge Nick Marotta for performing MR1 protein refolding experiments,  
467 Andrew C. McShan and Tyler J. Florio for assistance using the Disulfide by Design web server,  
468 Ananya Majumdar for assistance with data collection on the 800 MHz spectrometer at Johns  
469 Hopkins University, Leland Mayne for advising the HDX-MS experiments, and the Human  
470 Immunology Core at the University of Pennsylvania providing all primary cells used in this study.

471

472 **Data Availability**

473 NMR assignments for the wild type and open A\*02/MART1 complexes (for both the heavy and  
474 h $\beta$ <sub>2m</sub> light chains) have been deposited into the Biological Magnetic Resonance Data Bank  
475 (<http://www.bmrb.wisc.edu>) under accession numbers 51101 and 51781 respectively.



476 **References**

- 477 1. P. Parham, T. Ohta, Population Biology of Antigen Presentation by MHC Class I Molecules.  
478 *Science* **272**, 67–74 (1996).
- 479 2. M. Wieczorek, *et al.*, Major Histocompatibility Complex (MHC) Class I and MHC Class II  
480 Proteins: Conformational Plasticity in Antigen Presentation. *Frontiers in Immunology* **8**  
481 (2017).
- 482 3. P. J. Bjorkman, *et al.*, Structure of the human class I histocompatibility antigen, HLA-A2.  
483 *Nature* **329**, 506–512 (1987).
- 484 4. D. J. Barker, *et al.*, The IPD-IMGT/HLA Database. *Nucleic Acids Res*, gkac1011 (2022).
- 485 5. M. Harndahl, *et al.*, Peptide-MHC class I stability is a better predictor than peptide affinity of  
486 CTL immunogenicity: Antigen processing. *Eur. J. Immunol.* **42**, 1405–1416 (2012).
- 487 6. A. Bailey, *et al.*, Selector function of MHC I molecules is determined by protein plasticity. *Sci*  
488 *Rep* **5**, 14928 (2015).
- 489 7. D. N. Garboczi, D. T. Hung, D. C. Wiley, HLA-A2-peptide complexes: refolding and  
490 crystallization of molecules expressed in *Escherichia coli* and complexed with single  
491 antigenic peptides. *Proc Natl Acad Sci U S A* **89**, 3429–3433 (1992).
- 492 8. J. D. Altman, *et al.*, Phenotypic analysis of antigen-specific T lymphocytes. *Science* **274**, 94–  
493 96 (1996).
- 494 9. S. R. Hadrup, *et al.*, “High-Throughput T-Cell Epitope Discovery Through MHC Peptide  
495 Exchange” in *Epitope Mapping Protocols: Second Edition*, Methods in Molecular Biology™.,  
496 M. Schutkowski, U. Reineke, Eds. (Humana Press, 2009), pp. 383–405.
- 497 10. P. Cresswell, A. L. Ackerman, A. Giodini, D. R. Peaper, P. A. Wearsch, Mechanisms of MHC  
498 class I-restricted antigen processing and cross-presentation. *Immunological Reviews* **207**,  
499 145–157 (2005).
- 500 11. P. A. Wearsch, P. Cresswell, The quality control of MHC class I peptide loading. *Curr Opin*  
501 *Cell Biol* **20**, 624–631 (2008).
- 502 12. J. S. Blum, P. A. Wearsch, P. Cresswell, Pathways of Antigen Processing. *Annu Rev Immunol*  
503 **31**, 443–473 (2013).
- 504 13. A. C. McShan, *et al.*, Peptide exchange on MHC-I by TAPBPR is driven by a negative allosteric  
505 release cycle. *Nat Chem Biol* **14**, 811–820 (2018).
- 506 14. L. Li, M. Dong, X.-G. Wang, The Implication and Significance of Beta 2 Microglobulin: A  
507 Conservative Multifunctional Regulator. *Chinese Medical Journal* **129**, 448–455 (2016).
- 508 15. A.-K. Binz, R. C. Rodriguez, W. E. Biddison, B. M. Baker, Thermodynamic and Kinetic Analysis  
509 of a Peptide–Class I MHC Interaction Highlights the Noncovalent Nature and  
510 Conformational Dynamics of the Class I Heterotrimer. *Biochemistry* **42**, 4954–4961 (2003).

- 511 16. D. M. Gakamsky, P. J. Bjorkman, I. Pecht, Peptide Interaction with a Class I Major  
512 Histocompatibility Complex-Encoded Molecule: Allosteric Control of the Ternary Complex  
513 Stability. *Biochemistry* **35**, 14841–14848 (1996).
- 514 17. H. G. Ljunggren, *et al.*, Empty MHC class I molecules come out in the cold. *Nature* **346**, 476–  
515 480 (1990).
- 516 18. T. N. M. Schumacher, *et al.*, Direct binding of peptide to empty MHC class I molecules on  
517 intact cells and in vitro. *Cell* **62**, 563–567 (1990).
- 518 19. B. Rodenko, *et al.*, Generation of peptide-MHC class I complexes through UV-mediated  
519 ligand exchange. *Nat Protoc* **1**, 1120–1132 (2006).
- 520 20. M. Toebes, *et al.*, Design and use of conditional MHC class I ligands. *Nat Med* **12**, 246–251  
521 (2006).
- 522 21. J. J. Luimstra, *et al.*, A flexible MHC class I multimer loading system for large-scale detection  
523 of antigen-specific T cells. *J Exp Med* **215**, 1493–1504 (2018).
- 524 22. C. Hermann, L. M. Strittmatter, J. E. Deane, L. H. Boyle, The Binding of TAPBPR and Tapasin  
525 to MHC Class I Is Mutually Exclusive. *The Journal of Immunology* **191**, 5743–5750 (2013).
- 526 23. G. I. Morozov, *et al.*, Interaction of TAPBPR, a tapasin homolog, with MHC-I molecules  
527 promotes peptide editing. *Proc Natl Acad Sci U S A* **113**, E1006–E1015 (2016).
- 528 24. S. A. Overall, *et al.*, High throughput pMHC-I tetramer library production using chaperone-  
529 mediated peptide exchange. *Nature Communications* **11**, 1909 (2020).
- 530 25. H. Lan, *et al.*, Exchange catalysis by tapasin exploits conserved and allele-specific features of  
531 MHC-I molecules. *Nat Commun* **12**, 1–13 (2021).
- 532 26. Y. Sun, *et al.*, Xeno interactions between MHC-I proteins and molecular chaperones enable  
533 ligand exchange on a broad repertoire of HLA allotypes. *Science Advances* **9**, eade7151  
534 (2023).
- 535 27. M. Bouvier, D. C. Wiley, Structural characterization of a soluble and partially folded class I  
536 major histocompatibility heavy chain/beta 2m heterodimer. *Nat Struct Biol* **5**, 377–384  
537 (1998).
- 538 28. S. K. Saini, *et al.*, Not all empty MHC class I molecules are molten globules: Tryptophan  
539 fluorescence reveals a two-step mechanism of thermal denaturation. *Molecular*  
540 *Immunology* **54**, 386–396 (2013).
- 541 29. E. Kurimoto, *et al.*, Structural and functional mosaic nature of MHC class I molecules in their  
542 peptide-free form. *Mol Immunol* **55**, 393–399 (2013).
- 543 30. Z. Hein, *et al.*, Peptide-independent stabilization of MHC class I molecules breaches cellular  
544 quality control\*. *Journal of Cell Science*, jcs.145334 (2014).

- 545 31. Z. Hein, B. Borchert, E. T. Abualrous, S. Springer, Distinct mechanisms survey the structural  
546 integrity of HLA-B\*27:05 intracellularly and at the surface. *PLOS ONE* **13**, e0200811 (2018).
- 547 32. S. K. Saini, *et al.*, Empty peptide-receptive MHC class I molecules for efficient detection of  
548 antigen-specific T cells. *Sci. Immunol.* **4**, eaau9039 (2019).
- 549 33. A. Moritz, *et al.*, High-throughput peptide-MHC complex generation and kinetic screenings  
550 of TCRs with peptide-receptive HLA-A\*02:01 molecules. *Science Immunology* **4**, eaav0860  
551 (2019).
- 552 34. R. Anjanappa, *et al.*, Structures of peptide-free and partially loaded MHC class I molecules  
553 reveal mechanisms of peptide selection. *Nat Commun* **11**, 1314 (2020).
- 554 35. A. Achour, *et al.*, Structural Basis of the Differential Stability and Receptor Specificity of H-  
555 2Db in Complex with Murine versus Human  $\beta$ 2-Microglobulin. *Journal of Molecular Biology*  
556 **356**, 382–396 (2006).
- 557 36. R. J. Malonis, J. R. Lai, O. Vergnolle, Peptide-Based Vaccines: Current Progress and Future  
558 Challenges. *Chem. Rev.* **120**, 3210–3229 (2020).
- 559 37. J. Sidney, B. Peters, N. Frahm, C. Brander, A. Sette, HLA class I supertypes: a revised and  
560 updated classification. *BMC Immunology* **9**, 1 (2008).
- 561 38. D. M. Gakamsky, *et al.*, An Allosteric Mechanism Controls Antigen Presentation by the H-  
562 2Kb Complex. *Biochemistry* **38**, 12165–12173 (1999).
- 563 39. A. A. Dombkowski, K. Z. Sultana, D. B. Craig, Protein disulfide engineering. *FEBS Letters* **588**,  
564 206–212 (2014).
- 565 40. Y. C. Liu, *et al.*, A Molecular Basis for the Interplay between T Cells, Viral Mutants, and  
566 Human Leukocyte Antigen Micropolymorphism. *J Biol Chem* **289**, 16688–16698 (2014).
- 567 41. H. E. Van Wart, A. Lewis, H. A. Scheraga, F. D. Saeva, Disulfide Bond Dihedral Angles from  
568 Raman Spectroscopy. *Proc. Natl. Acad. Sci. U.S.A.* **70**, 2619–2623 (1973).
- 569 42. D. B. Craig, A. A. Dombkowski, Disulfide by Design 2.0: a web-based tool for disulfide  
570 engineering in proteins. *BMC Bioinformatics* **14**, 346 (2013).
- 571 43. M. Wieczorek, *et al.*, Major Histocompatibility Complex (MHC) Class I and MHC Class II  
572 Proteins: Conformational Plasticity in Antigen Presentation. *Frontiers in Immunology* **8**  
573 (2017).
- 574 44. K. Natarajan, *et al.*, The Role of Molecular Flexibility in Antigen Presentation and T Cell  
575 Receptor-Mediated Signaling. *Frontiers in Immunology* **9** (2018).
- 576 45. C. Thomas, R. Tampé, Proofreading of Peptide—MHC Complexes through Dynamic  
577 Multivalent Interactions. *Frontiers in Immunology* **8** (2017).

- 578 46. A. C. McShan, *et al.*, Molecular determinants of chaperone interactions on MHC-I for folding  
579 and antigen repertoire selection. *Proc. Natl. Acad. Sci. U.S.A.* **116**, 25602–25613 (2019).
- 580 47. N. G. Sgourakis, *et al.*, A Novel MHC-I Surface Targeted for Binding by the MCMV m06  
581 Immuno-evasin Revealed by Solution NMR. *J Biol Chem* **290**, 28857–28868 (2015).
- 582 48. M. Salzmann, K. Pervushin, G. Wider, H. Senn, K. Wüthrich, TROSY in triple-resonance  
583 experiments: New perspectives for sequential NMR assignment of large proteins. *Proc Natl*  
584 *Acad Sci U S A* **95**, 13585–13590 (1998).
- 585 49. Z. Li, *et al.*, The Mechanism of  $\beta$ 2m Molecule-Induced Changes in the Peptide Presentation  
586 Profile in a Bony Fish. *iScience* **23**, 101119 (2020).
- 587 50. K. Okamura, *et al.*, Discovery of an ancient MHC category with both class I and class II  
588 features. *Proceedings of the National Academy of Sciences* **118**, e2108104118 (2021).
- 589 51. G. Esposito, *et al.*, The Controlling Roles of Trp60 and Trp95 in  $\beta$ 2-Microglobulin Function,  
590 Folding and Amyloid Aggregation Properties. *Journal of Molecular Biology* **378**, 887–897  
591 (2008).
- 592 52. S. Ricagno, *et al.*, DE loop mutations affect  $\beta$ 2-microglobulin stability and amyloid  
593 aggregation. *Biochemical and Biophysical Research Communications* **377**, 146–150 (2008).
- 594 53. G. R. Masson, *et al.*, Recommendations for performing, interpreting and reporting hydrogen  
595 deuterium exchange mass spectrometry (HDX-MS) experiments. *Nat Methods* **16**, 595–602  
596 (2019).
- 597 54. A. van Hateren, *et al.*, Direct evidence for conformational dynamics in major  
598 histocompatibility complex class I molecules. *J Biol Chem* **292**, 20255–20269 (2017).
- 599 55. J. Jiang, *et al.*, Crystal structure of a TAPBPR-MHC I complex reveals the mechanism of  
600 peptide editing in antigen presentation. *Science* **358**, 1064–1068 (2017).
- 601 56. R. Buchli, *et al.*, Real-Time Measurement of in Vitro Peptide Binding to Soluble HLA-A\*0201  
602 by Fluorescence Polarization. *Biochemistry* **43**, 14852–14863 (2004).
- 603 57. J.-L. Chen, *et al.*, Structural and kinetic basis for heightened immunogenicity of T cell  
604 vaccines. *Journal of Experimental Medicine* **201**, 1243–1255 (2005).
- 605 58. J. Geng, J. D. Altman, S. Krishnakumar, M. Raghavan, Empty conformers of HLA-B  
606 preferentially bind CD8 and regulate CD8+ T cell function. *eLife* **7**, e36341 (2018).
- 607 59. S. A. Overall, *et al.*, High throughput pMHC-I tetramer library production using chaperone-  
608 mediated peptide exchange. *Nat Commun* **11**, 1909 (2020).
- 609 60. C. L. Dulberger, *et al.*, Human leukocyte antigen F (HLA-F) presents peptides and regulates  
610 immunity through interactions with NK-cell receptors. *Immunity* **46**, 1018-1029.e7 (2017).

- 611 61. F. T. Ilca, A. Neerincx, M. R. Wills, M. de la Roche, L. H. Boyle, Utilizing TAPBPR to promote  
612 exogenous peptide loading onto cell surface MHC I molecules. *Proc Natl Acad Sci U S A*  
613 **115**, E9353–E9361 (2018).
- 614 62. C. Hermann, *et al.*, TAPBPR alters MHC class I peptide presentation by functioning as a  
615 peptide exchange catalyst. *eLife* **4**, e09617 (2015).
- 616 63. F. T. Ilca, L. Z. Drexhage, G. Brewin, S. Peacock, L. H. Boyle, Distinct Polymorphisms in HLA  
617 Class I Molecules Govern Their Susceptibility to Peptide Editing by TAPBPR. *Cell Rep* **29**,  
618 1621-1632.e3 (2019).
- 619 64. M. G. Mage, *et al.*, THE PEPTIDE-RECEPTIVE TRANSITION STATE OF MHC-I MOLECULES:  
620 INSIGHT FROM STRUCTURE AND MOLECULAR DYNAMICS. *J Immunol* **189**, 1391–1399  
621 (2012).
- 622 65. A. C. McShan, *et al.*, TAPBPR promotes antigen loading on MHC-I molecules using a peptide  
623 trap. *Nat Commun* **12**, 3174 (2021).
- 624 66. A. van Hateren, T. Elliott, The role of MHC I protein dynamics in tapasin and TAPBPR-  
625 assisted immunopeptidome editing. *Current Opinion in Immunology* **70**, 138–143 (2021).
- 626

627 **Figures and Tables**

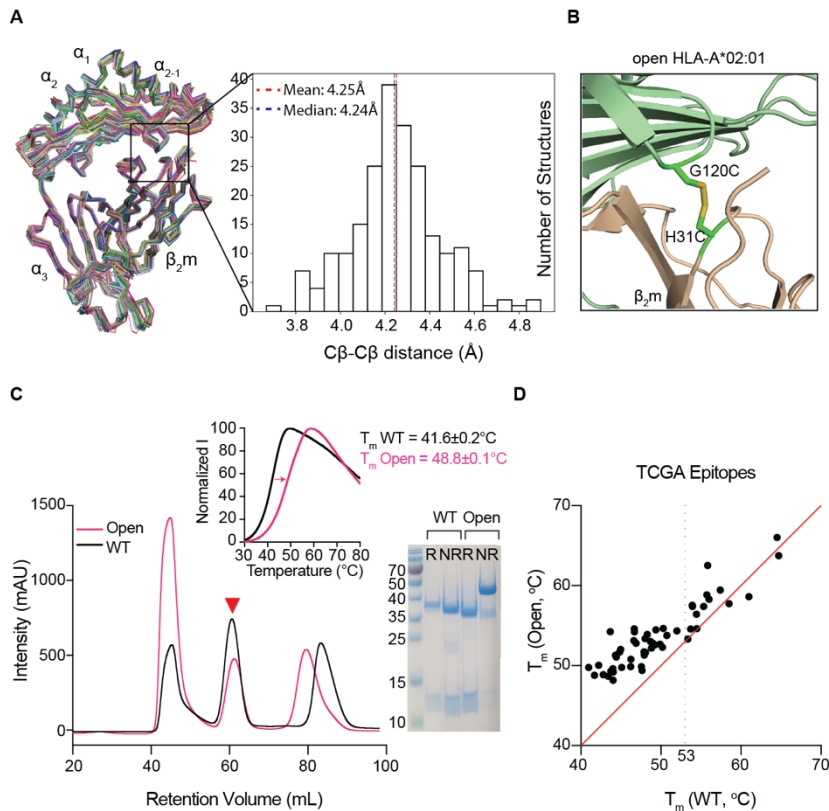

628

629 **Figure 1. Structure-guided stabilization of suboptimal peptide-loaded HLA-A\*02:01 by**  
 630 **engineered disulfide between the HC and  $\beta_{2m}$ .** **A.** Structure alignment and distribution of C $\beta$ -C $\beta$   
 631 distances between positions G120 of the HC and H31 of the  $\beta_{2m}$  derived from 215 pMHC-I/ $\beta_{2m}$   
 632 co-crystal structures with resolution values  $\leq 3\text{\AA}$ . The structures of 52 distinct alleles are aligned by  
 633 C $\alpha$  atoms of  $\alpha_1$ ,  $\alpha_2$ , and  $\alpha_3$  domains as ribbons. **B.** Structural model of HLA-A\*02:01/ $\beta_{2m}$ /TAX9 (PDB  
 634 ID:1DUZ) with G120 and H31 mutated to cysteines. HLA-A\*02:01 HC was colored in light green  
 635 and  $\beta_{2m}$  in wheat. **C.** SEC traces of the WT (black) and the G120C/H31C open (pink) HLA-  
 636 A\*02:01/ $\beta_{2m}$ /TAX8. The red triangle arrowhead indicates the complex peaks and is further  
 637 confirmed by SDS/PAGE analysis in reduced (R) or non-reduced (NR) conditions. DSF shows  
 638 thermal stability curves of the WT in black ( $T_m = 41.6^\circ\text{C}$ ) and the open variant in pink ( $T_m = 48.8^\circ\text{C}$ ).  
 639 The average of three technical replicates (mean) is plotted. **D.** Thermal stabilities correlation of the  
 640 WT and open HLA-A\*02:01/TAX8 loaded with each of 50 peptides from the Cancer Genome Atlas  
 641 (TCGA) epitope library are shown in dots. The average of three technical replicates (mean) is  
 642 plotted. The red line represents a conceptual 1:1 correlation (no difference in thermal stabilities).



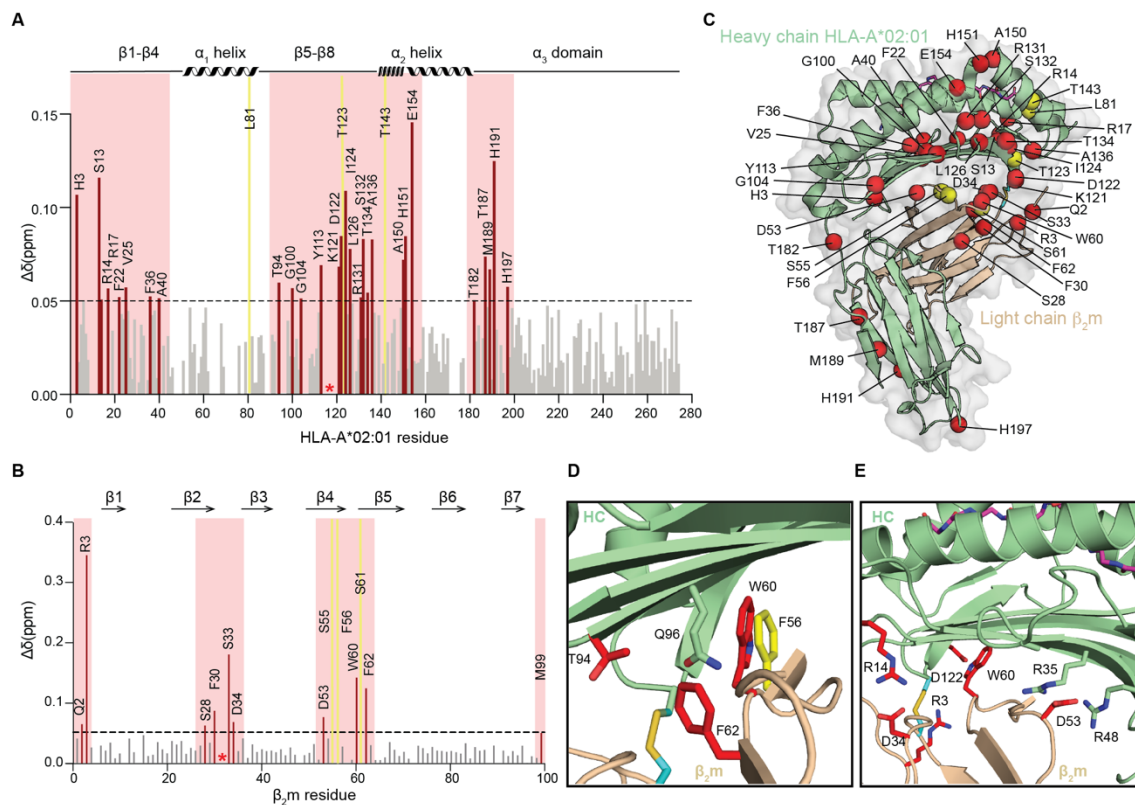

643

644

**Figure 2. Disulfide-engineered pHLA-A\*02:01 shows induced conformational adaptations in solution.** **A-B.** Calculated CSPs between the WT and open HLA-A\*02:01/ $\beta_2m$ /MART1 are plotted as bar graphs across **A.** HC and **B.**  $\beta_2m$  amide backbone. A significance threshold of 0.05 ppm is determined that is 5-fold higher than the  $^1H$  sensitivity of the NMR instrument. Residues with significant CSPs are highlighted in red, and exchange-broadened residues in the open HLA-A\*02:01 relative to the WT are colored in yellow. Cysteine mutations (G120C and H31C) are indicated by a red asterisk. **C.** Residues with CSPs above the significance threshold and exchange broadened in the open HLA-A\*02:01/ $\beta_2m$ /MART1 are plotted as red and yellow spheres for the amine, respectively, on a representative HLA-A\*02:01/ $\beta_2m$ /MART1 crystal structure (PDB ID: 3MRQ). **D-E.** Enlarged images of **D.** hydrophobic residues near the disulfide bond and **E.** residues within the hydrogen network. Side chains are displayed and highlighted in red for significant CSPs and yellow for exchange-broadening.

645

646

647

648

649

650

651

652

653

654

655



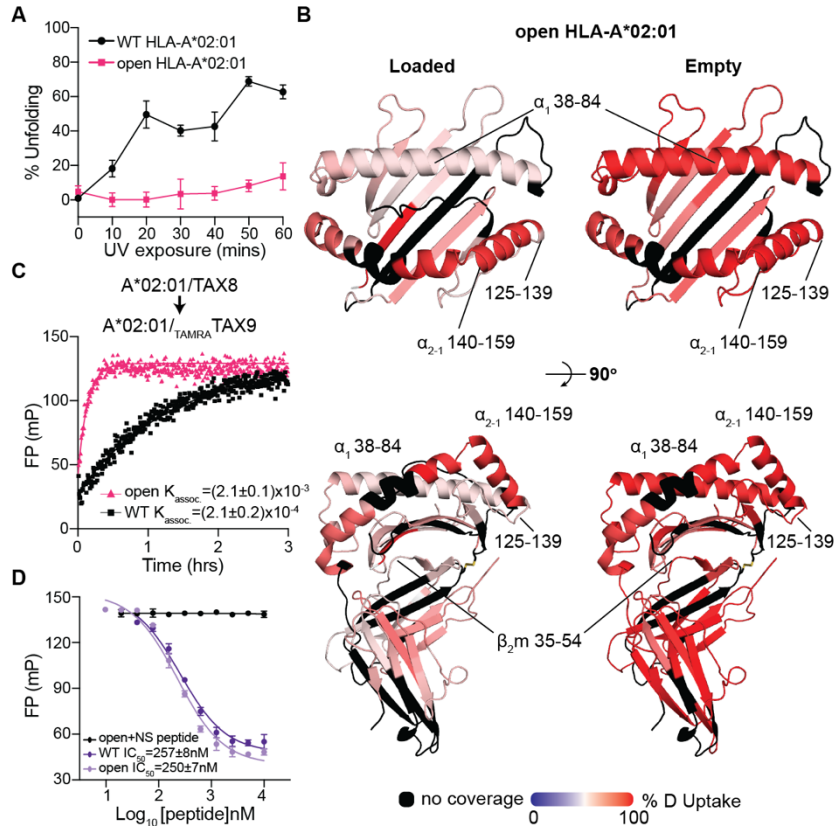

656

657 **Figure 3. Engineered disulfide stabilizes MHC-I at an open, peptide-receptive conformation.**

658 **A.** Percent unfolding defined by the normalized fluorescent intensity at 25°C for the WT or open

659 HLA-A\*02:01/KILGFVFJV upon UV irradiation. The duration of UV irradiation is shown on the x-

660 axis. Results of three technical replicates (mean  $\pm$   $\sigma$ ) are plotted. **B.** Percent deuterium uptake

661 resolved to individual residues upon 600-second deuterium labeling for peptide-loaded (left) and

662 empty (right) states are mapped onto the HLA-A\*02:01 crystal structure (PDB ID: 1DUZ) for

663 visualization. Red and blue colored regions indicate segments containing peptides with 100%

664  $\Delta$ HDX (red—more deuteration) or 0%  $\Delta$ HDX (blue—less deuteration), respectively; black indicates

665 regions where peptides were not obtained for peptide-loaded and empty protein states. **C.**

666 Association profiles of the fluorophore-conjugated peptide TAMRA TAX9 to the WT or open HLA-

667 A\*02:01/TAX8, as indicated. Results of three replicates (mean) are plotted. **D.** Competitive binding

668 of TAMRA TAX9 to the WT or open HLA-A\*02:01/TAX8 as a function of increasing peptide

669 concentration, measured by fluorescence polarization. An irrelevant peptide, p29 (YPNVNIHNF),

670 was used as a negative control.

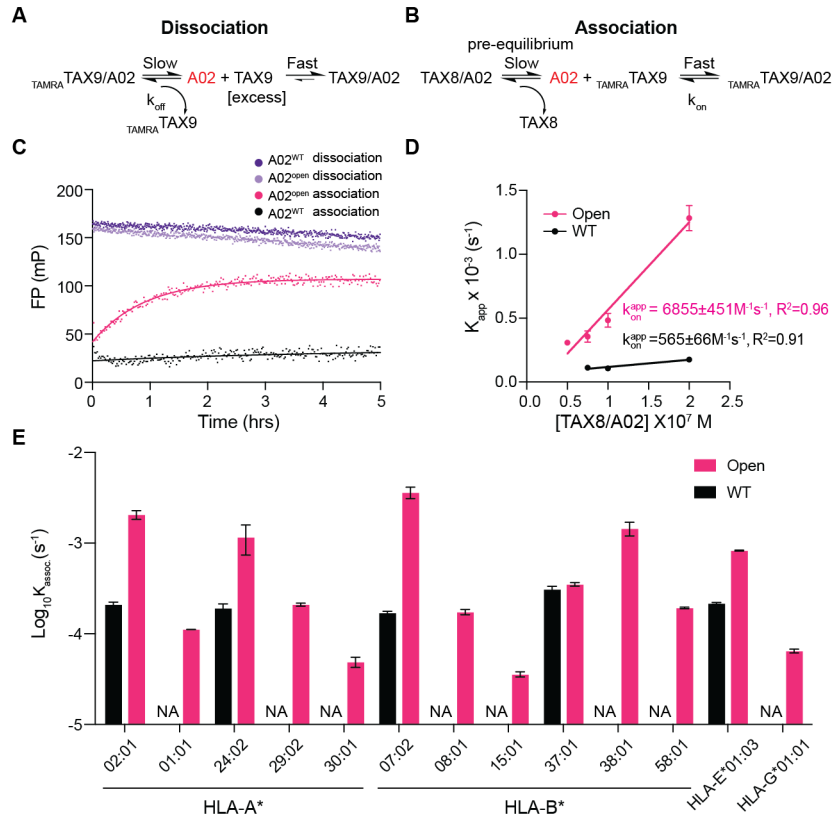

671

672

673

674

675

676

677

678

679

680

681

682

683

684

**Figure 4. Open MHC-I improves peptide exchange efficiency on a broad repertoire of HLA allotypes.** **A-B.** Schematic summary of fitted kinetics obtained from FP analyses of peptide exchange, showing **A.** the dissociation of 40 nM TAMRA-TAX9/A02 in the presence of 1  $\mu$ M unlabeled TAX9 and **B.** 40 nM TAMRA-TAX9 in different concentrations of TAX8/A02 (50, 75, 100, and 200nM). **C.** The dissociation profiles of 40 nM WT or open TAMRA-TAX9/A02 in the presence of 1  $\mu$ M unlabeled TAX9, and association profiles of 40 nM WT or open TAMRA-TAX9 in 50 nM TAX8/A02, as indicated. **D.** Linear correlations between the apparent rate constants  $K_{assoc}$  and the concentrations of TAX8/A02. The extrapolation of the slope between  $K_{assoc}$  and the concentrations of TAX8/A02 determine the apparent association rate  $k_{on}$ . **E.** Log-scale comparison of  $K_{assoc}$  for the WT (black) or the open (pink) HLA-A\*02:01, A\*01:01, A\*24:02, A\*29:02, A\*30:01, B\*07:02, B\*08:01, B\*15:01, B\*37:01, B\*38:01, B\*58:01, E\*01:03, and G\*01:01. The apparent rate constant  $K_{assoc}$  was determined by fitting the raw trace to a monoexponential association model. NA indicates no fitted  $K_{assoc}$ . Results of three technical replicates (mean  $\pm$   $\sigma$ ) are plotted.

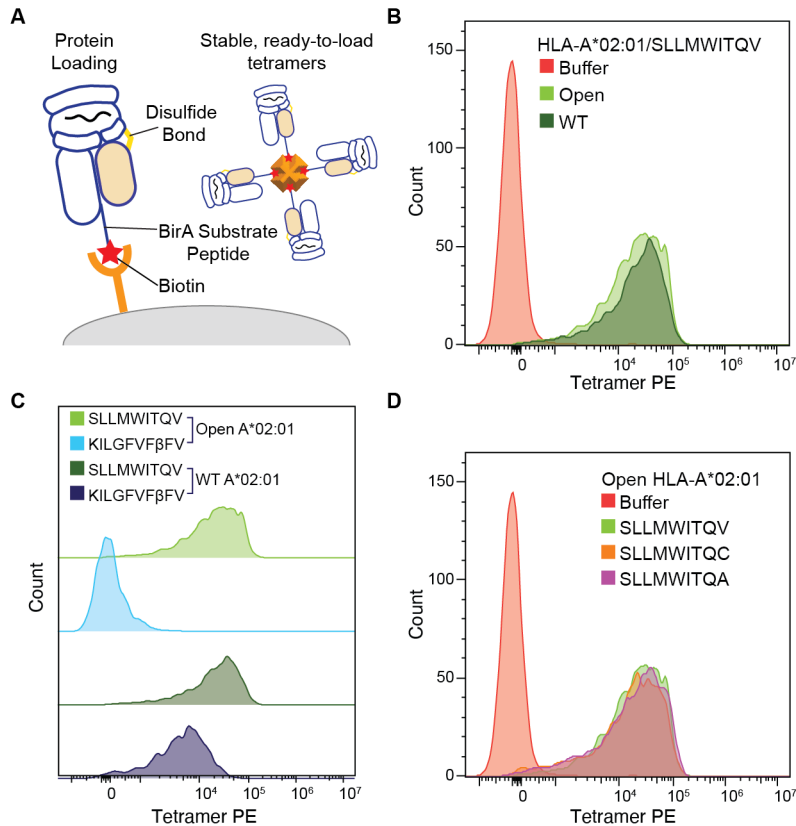

685

686

687

688

689

690

691

692

693

694

695

**Figure 5. Open HLA-A\*02:01 molecules enable effective T cell detection by reducing non-specific background staining compared to the WT. A.** A schematic summary of the disulfide-linked HLA-I molecules with the desired BSA tag enables biotinylation and sets the stage for tetramerization. **B.** Staining of 1G4-transduced primary CD8<sup>+</sup> T cells with PE-tetramers of open and WT HLA-A\*02:01/NY-ESO-1(V), light and dark green, respectively. **C.** Staining of 1G4-transduced primary CD8<sup>+</sup> T cells with PE-tetramers of open and WT HLA-A\*02:01/NY-ESO-1(V), light and dark green, compared to open and WT HLA-A\*02:01 loaded with a non-specific peptide, light and dark blue. **D.** Staining of 1G4-transduced primary CD8<sup>+</sup> T cells with PE-tetramers of open HLA-A\*02:01 loaded with different NY-ESO-1 peptides SLLMWITQV (light green), SLLMWITQVC (orange), and SLLMWITQA (purple).

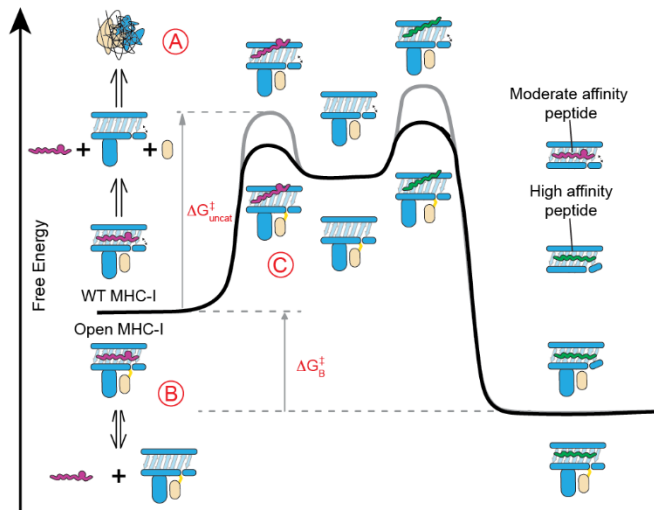

696

697 **Figure 6. Open MHC-I molecules modulate the free energy landscape of peptide exchange.**

698 **A.** WT MHC-I molecules loaded with moderate-affinity placeholder peptides can spontaneously

699 generate empty molecules, leading to  $\beta_2m$  loss and irreversible protein aggregation. **B-C.** Open

700 MHC-I enhances peptide exchange by **B.** stabilizing empty molecules to prevent their aggregation

701 and **C.** lowering the activation free energy ( $\Delta G_{\text{uncat}}^\ddagger$ ) for peptide un-loading via a stabilized open

702 conformation.
